# ACE2 Netlas: In-silico functional characterization and drug-gene interactions of *ACE2* gene network to understand its potential involvement in COVID-19 susceptibility

Gita A Pathak, Frank R Wendt, Aranyak Goswami, Flavio De Angelis, COVID-19 Human Genetics Initiative, Renato Polimanti

Yale School of Medicine, Department of Psychiatry, Division of Human Genetics, New Haven, CT  
Veteran Affairs Connecticut Healthcare System, West Haven, CT

✉ Corresponding author: Renato Polimanti, PhD

E-mail: [renato.polimanti@yale.edu](mailto:renato.polimanti@yale.edu)

Address: VA CT 116A2, 950 Campbell Avenue  
West Haven, CT, 06516, USA

Phone: +1 (203) 937-5711 ext. ext.5745

Fax: +1 (203) 937-3897

**Running Title:** Characterization of *ACE2*- gene network

## Abstract

Angiotensin-converting enzyme-2 (*ACE2*) receptor has been identified as the key adhesion molecule for the transmission of the SARS-CoV-2. However, there is no evidence that human genetic variation in *ACE2* is singularly responsible for COVID-19 susceptibility. Therefore, we performed a multi-level characterization of genes that interact with *ACE2* (*ACE2*-gene network) for their over-represented biological properties in the context of COVID-19.

The phenome-wide association of 51 genes including *ACE2* with 4,756 traits categorized into 26 phenotype categories, showed enrichment of immunological, respiratory, environmental, skeletal, dermatological, and metabolic domains ( $p < 4e-4$ ). Transcriptomic regulation of *ACE2*-gene network was enriched for tissue-specificity in kidney, small intestine, and colon ( $p < 4.7e-4$ ). Leveraging the drug-gene interaction database we identified 47 drugs, including dexamethasone and spironolactone, among others.

Considering genetic variants within  $\pm 10$  kb of *ACE2*-network genes we characterized functional consequences (among others) using miRNA binding-site targets. MiRNAs affected by *ACE2*-network variants revealed statistical over-representation of inflammation, aging, diabetes, and heart conditions. With respect to variants mapped to the *ACE2*-network, we observed COVID-19 related associations in *RORA*, *SLC12A6* and *SLC6A19* genes.

Overall, functional characterization of *ACE2*-gene network highlights several potential mechanisms in COVID-19 susceptibility. The data can also be accessed at <https://gpwhiz.github.io/ACE2Netlas/>

**Keywords:** *ACE2*, COVID-19, miRNA, immune response, network

## 2 **1 Introduction**

---

2 SARS-CoV-2 (severe acute respiratory syndrome coronavirus 2) is the causative agent  
4 responsible for recent global spread of COVID-19 (coronavirus disease 2019) [1,2].  
Millions of people have been infected with the virus, which caused global lockdowns and  
6 heavily restricted interpersonal contact. These measures were taken to reduce viral  
spread through respiratory droplet exchange between persons.

8 SARS-CoV-2 is capable of entering the host cells via ACE2 (angiotensin converting  
enzyme 2) [3]. ACE2 is found on many different cell types, which normally helps regulate  
10 blood pressure and inflammation through cleavage of angiotensin II (ANG II) [4]. The virus  
occupies cell-surface of *ACE2* leading to accumulation of angiotensin (ANGII),  
12 inflammation, and cell death [3]. In the lungs, SARS-CoV-2 mediated ANGII accumulation  
leads to alveolar cell death and a reduction in oxygen uptake [5].

14 Although ACE2 is the cellular entry point, there is little evidence that genetic variation in  
*ACE2* is singularly responsible for COVID-19 susceptibility. Indeed, *ACE2* failed to  
16 associate with COVID-19 informative phenotype definitions from large genome-wide  
studies [6–8] . However, due to the functional role of ACE2 in SARS-CoV-2 infection, we  
18 hypothesize that genes interacting with ACE2 activity are enriched for molecular  
pathways relevant for COVID-19 susceptibility. Accordingly, we employed a top-down  
20 approach to analyze tissue-specific transcriptomic regulation, drug-gene interactions, and  
variant prioritization using genetic variants within the ACE2 gene-gene connectome and  
22 protein-protein interaction networks. With this approach we identified several biological  
processes and functional effects of ACE2-gene network relevant for the vast symptoms  
24 observed following SARS-CoV-2 infection.

## 26 **2 Results**

---

A study overview is presented in [Supplementary file1 Figure S1](#).

## 28 **2.1 The ACE2 gene connectome**

A total of 60 ACE2-interacting genes were identified from different network databases  
30 [\(Supplementary file2 Table S1; Figure 1\)](#).

## **2.2 Tissue-specific transcriptomic regulation**

32 Using differential expression data of 54 tissues (GTEx-v8), the genes in the ACE2-gene  
network were enriched for upregulated expression in small intestine ( $p=1.07 \times 10^{-16}$ ), colon  
34 ( $p=7.60 \times 10^{-13}$ ), kidney ( $p=1.93 \times 10^{-8}$ ), and liver ( $p=4.63 \times 10^{-4}$ ) [\(Figure 2; Supplementary  
file2 Table S2\)](#). No tissue-specific enrichment was observed for down-regulated  
36 expression.

## **2.3 Gene-Drug Interaction and Over-represented Biological Functions**

38 Out of 61 genes, 29 had information about their drug-gene interaction in the drug-gene  
interaction database (DGIdb)[9]. This assessment resulted in 238 unique drug-gene  
40 observations [\(Supplementary file2 Table S3\)](#). Some of the notable drugs observed via this  
approach were spironolactone, dexamethasone, metformin, and hydrocortisone. To  
42 understand the role of these drugs in affecting biological processes, we performed drug-  
set enrichment analysis. DSEA [10] found gene-ontology mapping for 47 drugs and tested  
44 against REACTOME gene ontology database. Although the results did not survive  
Bonferroni correction, the strongest enrichments were observed for platelet sensitization  
46 by low-density lipoprotein cholesterol ( $p=0.003$ ), IL-7 signaling ( $p=0.004$ ),  
glycerophospholipid biosynthesis ( $p=0.005$ ), and viral messenger RNA synthesis  
48 ( $p=0.011$ ) [\(Figure 3; Supplementary file2 Table S4\)](#).

## **2.4 Over-representation of phenotypic domains within ACE2 gene network**

50 A phenome-wide association study (PheWAS) was performed for 51 genes leveraging  
data from the GWASAtlas [11]. The GWASAtlas categorized traits into 26 phenotype  
52 domains [\(Supplementary file1 Figures S2-S52; Supplementary file2 Table S5\)](#). Each  
domain was tested for enrichment of significant traits versus non-significant traits  
54 [\(Supplementary file2 Table S6\)](#). Six domains were significant: 'Immunological'  
( $p=7.62 \times 10^{-25}$ ), 'Respiratory' ( $p=1.30 \times 10^{-8}$ ), 'Skeletal' ( $2.94 \times 10^{-8}$ ), 'Dermatological'  
56 ( $p=7.91 \times 10^{-8}$ ), 'Environmental' ( $p=2.21 \times 10^{-7}$ ), and 'Metabolic' ( $4.33 \times 10^{-4}$ ) [\(Supplementary](#)

file2 Table S7). *SLC44A4* had the highest number of associated traits across the  
58 significant domains ( $n_{\text{total}} = 173$ ) followed by *APOA1* had highest number of traits  
associations, mostly metabolic ( $n_{\text{total}} = 100$ ; metabolic = 71) (Figure 4). *SLC44A4*, *APOA1*,  
60 and *RORA* showed associations across all six enriched domains.

## 2.5 Characterization of SNPs

62 We extracted all 957,222 SNPs in the ACE2-network and annotated for allele frequency  
(Supplementary file3), nearby genes and coordinates (Supplementary file4), Combined  
64 Annotation Dependent Depletion (CADD) [12] and DeepSEA [13] scores. There were  
98,529 SNPs with CADD score  $>10$ , which corresponds to the top 10% pathogenic  
66 variants across the human genome (Supplementary file5). To identify their regulatory  
consequences, variants were annotated with DeepSEA which provides functional  
68 probability of the SNPs in serving as gene expression, disease and chromatin regulating  
variants. There were 12,095 SNPs within the ACE2-gene network which had  $>50\%$   
70 functional probability (DeepSEA functional score  $> 0.5$ ) (Supplementary file6). The  
miRNAs altered by the SNPs were analyzed for over-represented miRNA-family, biological  
72 functions, and diseases considering false discovery rate multiple testing correction (FDR  
 $p < 0.05$ ). There were 4 miRNA clusters that were enriched, miR-302b, miR-181d  
74 ( $p = 0.0079$ ), miR-17, and 106a ( $p = 0.00298$ ). We found 65 biological functions that were  
significant and the top five significant biological processes were cell death ( $p = 1.5 \times 10^{-20}$ ),  
76 inflammation ( $p = 2.57 \times 10^{-20}$ ), cell cycle ( $p = 2.09 \times 10^{-18}$ ), apoptosis ( $p = 4.15 \times 10^{-18}$ ), and  
immune response ( $p = 3.17 \times 10^{-17}$ ) (Figure 5). We observed a total of 152 significant  
78 diseases of which the most significant were diabetes mellitus type 2 ( $p = 1.55 \times 10^{-22}$ ),  
hepatitis c virus infection ( $p = 5.56 \times 10^{-21}$ ), atherosclerosis ( $p = 3.08 \times 10^{-19}$ ), heart failure  
80 ( $p = 4.22 \times 10^{-19}$ ), and Alzheimer's disease ( $p = 1.35 \times 10^{-17}$ ) (Supplementary file2 Table S8).

## 2.6 Neanderthal LA introgression within ACE2 network SNPs

82 Due to the Neanderthal introgression observed in 3p21 locus as risk to COVID-19 [14],  
we compared mean probability of Neanderthal LA between the ACE2-network SNP set  
84 (mean = 0.032) and 1,000 randomly selected SNP sets with comparable genomic features  
(range of Neanderthal LA means = 0.027-0.036). The ACE2-network SNPs did not show

86 evidence of Neanderthal LA introgression significantly different from those expected by  
chance ( $p=0.663$ ) ([Supplementary file1 Figure 55](#)).

## 88 2.7 Annotation of network SNPs using the COVID-19 GWAS

We tested ACE2-network SNPs with respect to six COVID-19-related phenotypes (Freeze  
90 3) released by the COVID-19 Host Genetics Initiative [15]. To identify independent  
variants, the variants were pruned for linkage disequilibrium ( $LD < 0.1$  within 250kb  
92 genomic size) and clumped for  $p$ -value  $< 0.01$ . Variants surviving multiple testing were  
annotated for eQTLs, and mQTLs. Three genes – *RORA*, *SLC12A6*, and *SLC6A19* –  
94 showed associations with multiple COVID-19 phenotypes ([Supplementary file2 Tables  
S9-S14](#); [Supplementary file6 Figures S56-S61](#)). *RORA* SNPs were associated with  
96 COVID-19 positive status ( $rs17303202$ ,  $p=2.35E-5$ ), laboratory-confirmed positive  
COVID-19 status ( $rs4774377$ ,  $p=8.25E-5$ ), hospitalized COVID-19 ( $rs17303202$ ,  $p=2.76E-$   
98  $05$ ), and COVID-19 with very severe respiratory symptoms ( $rs341419$ ,  $p=8.13E-4$ ). The  
SNPs in *RORA* gene are also associated with gene expression of *RORA* gene  
100 ( $rs12912196$ ;  $p=3.9E-5$ ) and trans-mQTL (cg00930615 in *ANXA2*). *SLC12A6* associations  
were observed with respect to COVID-19 ( $rs145719616$ ,  $p=1.19E-4$ ), hospitalized COVID-  
102 19 ( $rs192235418$ ,  $p=4.42E-4$ ), COVID-19 with very severe respiratory ( $rs2705343$ ,  
 $p=1.86E-3$ ), and. *SLC6A19* SNPs were associated with severe COVID-19 phenotype  
104 definitions, i.e. COVID-19 with very severe respiratory confirmed ( $rs76067074$ ,  $p=2.65E-$   
 $3$ ) and hospitalized COVID-19( $rs76067074$ ,  $p=2.52E-4$ ).

## 106 3 Discussion

---

*ACE2* is expressed in several tissues and plays a key role in host-entry of SARS-CoV-2  
108 [16]. However, the genomic profile of *ACE2* is limited in explaining the vast symptomology  
observed for COVID-19. Understanding *ACE2* associated molecular networks presents  
110 several functional insights between genetic targets based on gene expression, topology,  
and protein and signaling relationships [17]. Due to the well-characterized role of *ACE2* in  
112 SARS-CoV-2 infection, we generated novel information regarding the molecular and  
phenotypic characteristics of ACE gene network in the context of their potential

114 involvement in COVID-19 susceptibility. Our PheWAS-based analysis showed that genetic  
variation within ACE2 gene network is associated with immunity, respiratory, and  
116 metabolic traits. This is in line with known epidemiology of COVID-19 and its comorbidities  
[18,19].

118 The expression of ACE2-network genes was enriched for regulatory mechanisms related  
to small intestine, colon, kidney, and liver. It is hypothesized that furin, a serine protease  
120 present in lungs but also highly expressed in small intestine, presents S-spike for  
attachment of the ACE2 receptor [20]. Patients with kidney disease have higher risk for  
122 COVID-19 severe symptoms [21]. Additionally, the inflammation and cytokine storm from  
COVID-19 is observed to damage kidney tissues [22]. Lastly, modest increase in liver  
124 enzymes has been associated with COVID-19, and returning to baseline during the  
recovery phase [23].

126 Understanding the genes that interact with ACE2 receptor has potential to understand  
drug-targets and molecular processes that might play a role in susceptibility and  
128 treatment response of COVID-19. The drug-gene interaction analysis within ACE2  
network identified dexamethasone, reported to lower mortality in COVID-19 cases  
130 requiring mechanical ventilation [24]. Drugs – spironolactone and hydrocortisone target  
the androgen system. The androgen receptor has been associated with severe  
132 symptomology of COVID-19 [25]. Spironolactone is a diuretic and alleviates respiratory  
symptoms by reducing fluid from the lungs [26]. The use of spironolactone is currently  
134 being tested for acute respiratory distress syndrome in COVID-19 patients [27].  
Hydrocortisone is currently under clinical trials for treating COVID-19 related hypoxia  
136 symptoms [28]. Among the other compounds identified, metformin, a known drug for  
treating diabetes, can also affect respiratory outcomes [29]. A recent study reported  
138 protective effects of metformin in women with diabetes and obesity who were admitted  
with COVID-19 diagnosis [30]. Lastly, melatonin has been hypothesized to improve  
140 general immunity and lower oxidative stress generated from SARS-CoV-2 infection [31].

142 The miRNA target sites altered by ACE2-network SNPs identified miR-302b and miR-181d  
144 as over-represented miRNA clusters. The downregulated expression of miR-302b has  
146 been observed to reduce survival rates in chronic obstructive pulmonary disease (COPD)  
148 patients [32]. A meta-analysis showed that COPD diagnosis increased susceptibility to  
150 COVID-19 [33]. The miRNA-181 cluster has been associated with regulation of TNF-alpha  
152 [34], T-cell aging [35] and emphysema [36]. miRNA-17 and 106 belong to same miRNA  
154 family, miRNA-17 is upregulated in bronchoalveolar stem cells to lower SARS-CoV  
156 replication [37]. An *in silico* study of miRNA targets for SARS-CoV-2 genomic sequence  
158 found miRNA-17 as one of the targets with experimental evidence of its upregulation in  
160 H7N9 Influenza virus infection [38]. The top over-represented diseases in miRNA-ACE2-  
network-SNPs were diabetes, hepatitis C viral infection, heart failure and Alzheimer's  
disease. COVID-19 in individuals with diabetes has been reported to require  
hospitalization than non-diabetic individuals [39]. Furthermore, SARS-CoV-2 infection  
contributes in the development of ketosis in diabetic individuals resulting in longer length  
of hospitalization stay [40]. Triglyceride and glucose index was associated with severity of  
COVID-19 [41]. While there are limited studies about hepatitis C in COVID-19 patients  
[42], heart failure was reported by multiple studies as being associated with COVID-19  
severity [43,44]. Alzheimer's disease is another condition associated with COVID-19  
susceptibility [45], including *APOE4* carrier status with increased risk of severe COVID-  
19 [46].

162 In contrast to specific enrichment of Neanderthal LA in a COVID-19 risk locus on  
164 chromosome 3 [47], there is no evidence of increased Neanderthal LA in the ACE2  
166 network investigated here. This suggests that, although some loci conferring risk for  
168 COVID-19 severity, such as the one identified on chromosome 3, may have originated  
from Neanderthal admixture events, this mechanism did not shape the genetic  
architecture of the ACE2 network responsible for entry of SARS-CoV-2 into host cellular  
machinery.

168 Lastly, among ACE2-network-SNPs, potential COVID-19 risk alleles were observed in  
*RORA* gene with respect to multiple COVID-19 phenotypes. *RORA* protein product is



170 involved in immune response, cancer and metabolism [48]. *RORA* plays a role in the  
activation of T helper cells during lung inflammation by regulating tumor necrosis factor  
172 and interleukins [49,50], and its protein product showed multiple regulatory functions in  
human epithelial cell cultures inoculated with SARS-CoV-1 [51]. The hypothesis-free  
174 approach of genome-wide association of hospitalized COVID-19 vs the population  
highlighted *SLC6A20* with genome-wide significance on chromosome 3 locus. The  
176 *SLC12* (*SLC12A6*) class is responsible for inorganic ions such as sodium and chloride  
while the *SLC6* class (*SLC6A19*, identified via network approach and *SLC6A20*, identified  
178 via genome-wide approach) are responsible for transport of amino acids such as  
glutamate and glycine which are important neurotransmitter activity [52]. *SLC6A19*  
180 (among other *SLC*-class genes) serves similar function to *SLC6A20*, both are expressed  
in the intestinal tissue and contingent upon *ACE2* expression [53]. Multiple studies report  
182 more than 10% of the COVID-19 confirmed patients exhibit gastrointestinal symptoms[54–  
56]

184 Although we provided a wide range of information highlighting the molecular and  
phenotypic characteristics of *ACE2* gene network and their putative implications with  
186 COVID-19 risk, the findings reported have to be considered exploratory. We used  
appropriate computational methods and statistical approaches to generate reliable  
188 evidence useful to open new directions in COVID-19 research. We also highlighted when  
the results reported did not survive stringent multiple testing correction. This limitation is  
190 particularly relevant with respect to the *ACE2* network genetic associations. Due to the  
limited statistical power of the genome-wide data available to date, none of the risk alleles  
192 identified as functionally relevant survive genome-wide testing correction. Further  
analyses will be needed to validate our current findings.

#### 194 **4 Conclusion**

---

*ACE2* is one of the few molecular targets recognized to play a key role in the COVID-19  
196 pathogenesis. We conducted a comprehensive analysis leveraging multiple resources  
(e.g., drug-gene interactions, tissue-specific transcriptomic profile, and phenome-wide

198 and genome-wide datasets) to expand our understanding of the genomic characteristics  
of the host *ACE2* gene network. Overall, our findings highlight the potential mechanisms  
200 linking *ACE2* systems biology to COVID-19 susceptibility.

## 5 Methods

---

### 202 5.1 Gene network collection

Information regarding *ACE2* gene network was mined from GeneMANIA [57], Stringdb  
204 [58], APID [59], GeneNetwork [60], Biogrid[61] and FunctionalNet [62]. Immediate genes  
connections that were available in each databank with their default settings result in 61  
206 unique genes (60 genes plus *ACE2*) ([Supplementary file1 Figure 1](#); [Supplementary file2 Table S1](#)). The genomic coordinates for the genes were annotated using biomaRt [63],  
208 ensemble GRCh37/hg19. The analysis and visualization were performed in R 3.6.

### 5.2 2.2 Tissue-specific transcriptomic regulation

210 The tissue specificity was tested for 60 *ACE2*-interacting genes in FUMA [64]. The input  
genes were tested for pre-calculated tissue-specific differentially expressed genes from  
212 the GTEx v8 [65]. We also considered the t-statistic sign for up and down-regulated genes  
against protein coding genes as background. Enrichments were performed using  
214 hypergeometric tests and significant enrichments were defined according to Bonferroni  
corrected p-value  $\leq 0.05$ .

### 216 5.3 Phenome-wide analysis of *ACE2* gene network

A phenome-wide association study (PheWAS) was performed for 51 of 60 genes that  
218 were present in GWASAtlas [11] using all traits available per gene. Statistical significance  
was determined by applying a Bonferroni multiple-testing correction accounting for the  
220 number of GWAS traits (4,765 traits) available in the GWASAtlas ( $p < 1.05 \times 10^{-5}$ ). Each trait  
was grouped into a domain ([Supplementary file2 Table S5](#)) which was tested for  
222 enrichment using one-sided Fisher's exact test for high proportion of significant traits  
versus all others tested. A significant domain enrichment was defined considering a  
224 Bonferroni-corrected threshold accounting for the number of domains tested (p-value  $<$   
0.0019;  $0.05/26$ ).

## 226 **5.4 Gene-Drug Interactions and Biological Functions**

Information on drugs that interact with ACE2 network genes were extracted from The  
228 Drug-Gene Interaction database (DGIdb) [9] followed by drug-set enrichment for over  
represented biological functions using DSEA (Drug-Set Enrichment Analysis) [10].

## 230 **5.5 Characterization of SNPs**

Single nucleotide polymorphism (SNPs) were extracted based on the genomic  
232 coordinates of the genes ( $\pm 10\text{kb}$ ) for GrCh37; dbSNP153 from the UCSC browser [66]  
using bigbed utilities [67], and referred to as 'ACE2-network SNPs.' ACE2-network SNPs  
234 were annotated for global allele frequency, Combined Annotation-Dependent Depletion  
(CADD) score [12], deep learning based algorithm framework (DeepSEA) [13], and target  
236 miRNAs using SNPnexus [68]. DeepSEA is a deep learning-based algorithmic framework  
for predicting the chromatin effects of sequence alterations with single nucleotide  
238 sensitivity [13]. The identified miRNAs were tested for over-represented miRNA clusters,  
functions, and diseases using TAM 2.0 [69].

## 240 **5.6 Neanderthal introgression**

Motivated by evidence of a chromosome 3 COVID-19 risk locus enriched of Neanderthal  
242 local ancestry (LA) [47], we compared the distribution of probability of Neanderthal LA in  
our COVID-19 ACE2-network SNP set and 1,000 randomly sampled SNP sets comprised  
244 on SNPs across the genome with comparable genomic features. ACE2-network SNPs  
were mapped using previously-defined Neanderthal LA data [70,71]. A total of 6,822 LD-  
246 independent pairwise SNPs ( $r^2=0.1$  and  $p=0.1$  in 250kb window size) were used as  
standard input for SNPsnap [72]. In SNPsnap, 1,249/6,822 independent ACE2 network  
248 SNPs could be matched based on the following genomic features relative to the input  
SNP list: minor allele frequency within 2%, gene density within 50%, nearest gene within  
250 50%, and number of linkage disequilibrium groups within 50%. SNPsnap was instructed  
to exclude the ACE2-network SNP list from the pool of eligible feature-matched SNPs.  
252 Non-parametric Wilcoxon rank sum tests were used to compare the Neanderthal LA of  
our ACE2 network SNP list to that of all 1,000 random SNP sets and multiple testing  
254 correction was applied to adjust for a false discovery rate of 5%.

## 5.7 Association statistics of ACE2 network SNPs from the COVID-19 Host Genetics Initiative (HGI)

256  
258 The ACE2-network SNPs were extracted from association statistics released by the  
260 COVID-19 HGI [15] for six phenotypes describing COVID-19 susceptibility. These  
262 phenotypes were A2\_V2 (very severe respiratory confirmed COVID-19 cases [N=536] vs.  
264 population[N=329391]), B1\_V2 (hospitalized COVID-19 cases [N=928] vs. not hospitalized  
266 COVID-19 cases [N=2028]), B2\_V2 (hospitalized COVID-19 cases [N=3199] vs.  
268 population [N=897488]), C1\_V2 (COVID-19 cases [N=3523] vs. lab/self-reported negative  
270 [N=36634]), C2\_V2 (COVID-19 cases [N=6696] vs. population [N=1073072]), and D1\_V2  
(predicted COVID-19 cases from self-reported symptoms [N=1865] vs. predicted or self-  
reported non-COVID-19 cases [N=29174]). The SNPs of the ACE2 network were  
extracted and pruned for LD and p-value using plink1.9. The multiple testing correction  
was applied using Bonferroni p-value < 0.05. These significant SNPs were annotated  
further for pathogenicity using Combined Annotation Dependent Depletion (CADD) score  
and their role as quantitative trait loci (QTL) for gene expression using GTE<sub>x</sub>, and  
methylation using QTLbase [73].

## 6 Author Contribution

---

272 G.A.P conceptualized the study design, analyzed, and drafted the manuscript. F.R.W.  
contributed to analysis, and manuscript writing. Authors, A.G., F.D.A. and R.P. contributed  
274 to result interpretation, manuscript drafting and revision. R.P. supervised the study and  
finalized the manuscript.

## 7 Competing Interests

---

The authors have no competing interests.

## 8 Acknowledgements

---

278 We would like to acknowledge support from the National Institutes of Health (R21  
280 DC018098, R21 DA047527, R01 DA12690, F32 MH122058), and thank the COVID-19

Host Genetics Initiative (<https://www.covid19hg.org/acknowledgements/>) for providing  
282 open access to genetic association data.

## 9 Data Availability

---

284 The data presented is available in supplementary files and also on  
<https://gpwhiz.github.io/ACE2Netlas/>

## 286 10 References

---

- 288 [1] Zhou P, Yang X-L, Wang X-G, Hu B, Zhang L, Zhang W, et al. A pneumonia outbreak  
associated with a new coronavirus of probable bat origin. *Nature* 2020;579:270–273.  
290 doi:10.1038/s41586-020-2012-7.
- [2] Wu F, Zhao S, Yu B, Chen Y-M, Wang W, Song Z-G, et al. A new coronavirus  
292 associated with human respiratory disease in China. *Nature* 2020;579:265–269.  
doi:10.1038/s41586-020-2008-3.
- 294 [3] Walls AC, Park Y-J, Tortorici MA, Wall A, McGuire AT, Velesler D. Structure,  
Function, and Antigenicity of the SARS-CoV-2 Spike Glycoprotein. *Cell*  
296 2020;181:281–292.e6. doi:10.1016/j.cell.2020.02.058.
- [4] Hamming I, Cooper ME, Haagmans BL, Hooper NM, Korstanje R, Osterhaus ADME,  
298 et al. The emerging role of ACE2 in physiology and disease. *J Pathol* 2007;212:1–  
11. doi:10.1002/path.2162.
- 300 [5] Wang D, Hu B, Hu C, Zhu F, Liu X, Zhang J, et al. Clinical Characteristics of 138  
Hospitalized Patients With 2019 Novel Coronavirus-Infected Pneumonia in Wuhan,  
302 China. *JAMA* 2020;323:1061–1069. doi:10.1001/jama.2020.1585.
- [6] Shelton JF, Shastri AJ, Ye C, Weldon CH, Filshtein-Somnez T, Coker D, et al. Trans-  
304 ethnic analysis reveals genetic and non-genetic associations with COVID-19  
susceptibility and severity. *medRxiv* 2020. doi:10.1101/2020.09.04.20188318.

- 306 [7] Ellinghaus D, Degenhardt F, Bujanda L, Buti M, Albillos A, Invernizzi P, et al.  
Genomewide Association Study of Severe Covid-19 with Respiratory Failure. N Engl  
308 J Med 2020. doi:10.1056/NEJMoa2020283.
- [8] Pairo-Castineira E, Clohisey S, Klaric L, Bretherick A, Rawlik K, Parkinson N, et al.  
310 Genetic mechanisms of critical illness in Covid-19. medRxiv 2020.  
doi:10.1101/2020.09.24.20200048.
- 312 [9] Griffith M, Griffith OL, Coffman AC, Weible JV, McMichael JF, Spies NC, et al.  
DGldb: mining the druggable genome. Nat Methods 2013;10:1209–1210.  
314 doi:10.1038/nmeth.2689.
- [10] Napolitano F, Sirci F, Carrella D, di Bernardo D. Drug-set enrichment analysis: a  
316 novel tool to investigate drug mode of action. Bioinformatics 2016;32:235–241.  
doi:10.1093/bioinformatics/btv536.
- 318 [11] Watanabe K, Stringer S, Frei O, Umićević Mirkov M, de Leeuw C, Polderman TJC,  
et al. A global overview of pleiotropy and genetic architecture in complex traits. Nat  
320 Genet 2019;51:1339–1348. doi:10.1038/s41588-019-0481-0.
- [12] Rentzsch P, Witten D, Cooper GM, Shendure J, Kircher M. CADD: predicting the  
322 deleteriousness of variants throughout the human genome. Nucleic Acids Res  
2019;47:D886–D894. doi:10.1093/nar/gky1016.
- 324 [13] Zhou J, Troyanskaya OG. Predicting effects of noncoding variants with deep  
learning-based sequence model. Nat Methods 2015;12:931–934.  
326 doi:10.1038/nmeth.3547.
- [14] Zeberg H, Pääbo S. The major genetic risk factor for severe COVID-19 is inherited  
328 from Neanderthals. Nature 2020. doi:10.1038/s41586-020-2818-3.
- [15] COVID-19 Host Genetics Initiative. The COVID-19 Host Genetics Initiative, a global  
330 initiative to elucidate the role of host genetic factors in susceptibility and severity of  
the SARS-CoV-2 virus pandemic. Eur J Hum Genet 2020;28:715–718.  
332 doi:10.1038/s41431-020-0636-6.

- 334 [16] Hoffmann M, Kleine-Weber H, Schroeder S, Krüger N, Herrler T, Erichsen S, et al.  
SARS-CoV-2 Cell Entry Depends on ACE2 and TMPRSS2 and Is Blocked by a  
Clinically Proven Protease Inhibitor. *Cell* 2020;181:271–280.e8.  
336 doi:10.1016/j.cell.2020.02.052.
- [17] Huang JK, Carlin DE, Yu MK, Zhang W, Kreisberg JF, Tamayo P, et al. Systematic  
338 evaluation of molecular networks for discovery of disease genes. *Cell Syst*  
2018;6:484–495.e5. doi:10.1016/j.cels.2018.03.001.
- 340 [18] Gardinassi LG, Souza COS, Sales-Campos H, Fonseca SG. Immune and Metabolic  
Signatures of COVID-19 Revealed by Transcriptomics Data Reuse. *Front Immunol*  
342 2020;11:1636. doi:10.3389/fimmu.2020.01636.
- [19] Ejaz H, Alsrhani A, Zafar A, Javed H, Junaid K, Abdalla AE, et al. COVID-19 and  
344 comorbidities: Deleterious impact on infected patients. *J Infect Public Health* 2020.  
doi:10.1016/j.jiph.2020.07.014.
- 346 [20] Mönkemüller K, Fry L, Rickes S. COVID-19, coronavirus, SARS-CoV-2 and the small  
bowel. *Rev Esp Enferm Dig* 2020;112:383–388. doi:10.17235/reed.2020.7137/2020.
- 348 [21] Ajaimy M, Melamed ML. COVID-19 in Patients with Kidney Disease. *Clin J Am Soc*  
*Nephrol* 2020;15:1087–1089. doi:10.2215/CJN.09730620.
- 350 [22] Gao M, Wang Q, Wei J, Zhu Z, Li H. Severe Coronavirus disease 2019 pneumonia  
patients showed signs of aggravated renal impairment. *J Clin Lab Anal* 2020:e23535.  
352 doi:10.1002/jcla.23535.
- [23] Pawlotsky J-M. COVID-19 and the liver-related deaths to come. *Nat Rev*  
354 *Gastroenterol Hepatol* 2020. doi:10.1038/s41575-020-0328-2.
- [24] RECOVERY Collaborative Group, Horby P, Lim WS, Emberson JR, Mafham M, Bell  
356 JL, et al. Dexamethasone in Hospitalized Patients with Covid-19 - Preliminary Report.  
*N Engl J Med* 2020. doi:10.1056/NEJMoa2021436.

- 358 [25] Ghazizadeh Z, Majd H, Richter M, Samuel R, Zekavat SM, Asgharian H, et al.  
Androgen Regulates SARS-CoV-2 Receptor Levels and Is Associated with Severe  
360 COVID-19 Symptoms in Men. *BioRxiv* 2020. doi:10.1101/2020.05.12.091082.
- [26] Cadegiani FA, Goren A, Wambier CG. Spironolactone may provide protection from  
362 SARS-CoV-2: Targeting androgens, angiotensin converting enzyme 2 (ACE2), and  
renin-angiotensin-aldosterone system (RAAS). *Med Hypotheses* 2020;143:110112.  
364 doi:10.1016/j.mehy.2020.110112.
- [27] Dumanlı GY, Dilken O, Ürkmez S. Use of Spironolactone in SARS-CoV-2 ARDS  
366 Patients. *Turk J Anaesthesiol Reanim* 2020;48:254–255.  
doi:10.5152/TJAR.2020.569.
- 368 [28] Petersen MW, Meyhoff TS, Helleberg M, Kjær M-BN, Granholm A, Hjortsø CJS, et  
al. Low-dose hydrocortisone in patients with COVID-19 and severe hypoxia (COVID  
370 STEROID) trial-Protocol and statistical analysis plan. *Acta Anaesthesiol Scand* 2020.  
doi:10.1111/aas.13673.
- 372 [29] Yen F-S, Wei JC-C, Yang Y-C, Hsu C-C, Hwu C-M. Respiratory outcomes of  
metformin use in patients with type 2 diabetes and chronic obstructive pulmonary  
374 disease. *Sci Rep* 2020;10:10298. doi:10.1038/s41598-020-67338-2.
- [30] Bramante C, Ingraham N, Murray T, Marmor S, Hoversten S, Gronski J, et al.  
376 Observational Study of Metformin and Risk of Mortality in Patients Hospitalized with  
Covid-19. *medRxiv* 2020. doi:10.1101/2020.06.19.20135095.
- 378 [31] Shneider A, Kudriavtsev A, Vakhrusheva A. Can melatonin reduce the severity of  
COVID-19 pandemic? *Int Rev Immunol* 2020;39:153–162.  
380 doi:10.1080/08830185.2020.1756284.
- [32] Keller A, Ludwig N, Fehlmann T, Kahraman M, Backes C, Kern F, et al. Low miR-  
382 150-5p and miR-320b Expression Predicts Reduced Survival of COPD Patients.  
*Cells* 2019;8. doi:10.3390/cells8101162.



- 384 [33] Lippi G, Henry BM. Chronic obstructive pulmonary disease is associated with  
severe coronavirus disease 2019 (COVID-19). *Respir Med* 2020;167:105941.  
386 doi:10.1016/j.rmed.2020.105941.
- [34] Zhu J, Wang F-L, Wang H-B, Dong N, Zhu X-M, Wu Y, et al. TNF- $\alpha$  mRNA is  
388 negatively regulated by microRNA-181a-5p in maturation of dendritic cells induced  
by high mobility group box-1 protein. *Sci Rep* 2017;7:12239. doi:10.1038/s41598-  
390 017-12492-3.
- [35] Ye Z, Li G, Kim C, Hu B, Jadhav RR, Weyand CM, et al. Regulation of miR-181a  
392 expression in T cell aging. *Nat Commun* 2018;9:3060. doi:10.1038/s41467-018-  
05552-3.
- 394 [36] Osei ET, Florez-Sampedro L, Timens W, Postma DS, Heijink IH, Brandsma C-A.  
Unravelling the complexity of COPD by microRNAs: it's a small world after all. *Eur*  
396 *Respir J* 2015;46:807–818. doi:10.1183/13993003.02139-2014.
- [37] Mallick B, Ghosh Z, Chakrabarti J. MicroRNome analysis unravels the molecular  
398 basis of SARS infection in bronchoalveolar stem cells. *PLoS One* 2009;4:e7837.  
doi:10.1371/journal.pone.0007837.
- 400 [38] Khan MA-A-K, Sany MRU, Islam MS, Meheub MS, Islam ABMMK. Epigenetic  
regulator miRNA pattern differences among SARS-CoV, SARS-CoV-2 and SARS-  
402 CoV-2 world-wide isolates delineated the mystery behind the epic pathogenicity and  
distinct clinical characteristics of pandemic COVID-19. *BioRxiv* 2020.  
404 doi:10.1101/2020.05.06.081026.
- [39] Apicella M, Campopiano MC, Mantuano M, Mazoni L, Coppelli A, Del Prato S.  
406 COVID-19 in people with diabetes: understanding the reasons for worse outcomes.  
*Lancet Diabetes Endocrinol* 2020;8:782–792. doi:10.1016/S2213-8587(20)30238-2.
- 408 [40] Li J, Wang X, Chen J, Zuo X, Zhang H, Deng A. COVID-19 infection may cause  
ketosis and ketoacidosis. *Diabetes Obes Metab* 2020. doi:10.1111/dom.14057.

- 410 [41] Ren H, Yang Y, Wang F, Yan Y, Shi X, Dong K, et al. Association of the insulin  
resistance marker TyG index with the severity and mortality of COVID-19.  
412 *Cardiovasc Diabetol* 2020;19:58. doi:10.1186/s12933-020-01035-2.
- [42] Richardson S, Hirsch JS, Narasimhan M, Crawford JM, McGinn T, Davidson KW, et  
414 al. Presenting Characteristics, Comorbidities, and Outcomes Among 5700 Patients  
Hospitalized With COVID-19 in the New York City Area. *JAMA* 2020;323:2052–2059.  
416 doi:10.1001/jama.2020.6775.
- [43] Yancy CW, Fonarow GC. Coronavirus Disease 2019 (COVID-19) and the Heart-Is  
418 Heart Failure the Next Chapter? *JAMA Cardiol* 2020.  
doi:10.1001/jamacardio.2020.3575.
- 420 [44] Hanley B, Naresh KN, Roufousse C, Nicholson AG, Weir J, Cooke GS, et al.  
Histopathological findings and viral tropism in UK patients with severe fatal COVID-  
422 19: a post-mortem study. *Lancet Microbe* 2020. doi:10.1016/S2666-5247(20)30115-  
4.
- 424 [45] Chang TS, Ding Y, Freund MK, Johnson R, Schwarz T, Yabu JM, et al. Prior  
diagnoses and medications as risk factors for COVID-19 in a Los Angeles Health  
426 System. *medRxiv* 2020. doi:10.1101/2020.07.03.20145581.
- [46] Kuo C-L, Pilling LC, Atkins JL, Masoli JAH, Delgado J, Kuchel GA, et al. APOE e4  
428 genotype predicts severe COVID-19 in the UK Biobank community cohort. *J  
Gerontol A, Biol Sci Med Sci* 2020. doi:10.1093/gerona/glaa131.
- 430 [47] Zeberg H, Paabo S. The major genetic risk factor for severe COVID-19 is inherited  
from Neandertals. *BioRxiv* 2020. doi:10.1101/2020.07.03.186296.
- 432 [48] Cook DN, Kang HS, Jetten AM. Retinoic Acid-Related Orphan Receptors (RORs):  
Regulatory Functions in Immunity, Development, Circadian Rhythm, and  
434 Metabolism. *Nucl Receptor Res* 2015;2. doi:10.11131/2015/101185.

- 436 [49] Haim-Vilmovsky L, Walker JA, Henriksson J, Miao Z, Natan E, Kar G, et al. *Rora*  
regulates activated T helper cells during inflammation. *BioRxiv* 2019.  
doi:10.1101/709998.
- 438 [50] Nejati Moharrami N, Bjørkøy Tande E, Ryan L, Espevik T, Boyartchuk V. ROR $\alpha$   
controls inflammatory state of human macrophages. *PLoS One* 2018;13:e0207374.  
440 doi:10.1371/journal.pone.0207374.
- [51] de Almeida RMC, Thomas GL, Glazier JA. Transcriptogram analysis reveals  
442 relationship between viral titer and gene sets responses during Corona-virus  
infection. *BioRxiv* 2020. doi:10.1101/2020.06.16.155267.
- 444 [52] Lin L, Yee SW, Kim RB, Giacomini KM. SLC transporters as therapeutic targets:  
emerging opportunities. *Nat Rev Drug Discov* 2015;14:543–560.  
446 doi:10.1038/nrd4626.
- [53] Vuille-Dit-Bille RN, Liechty KW, Verrey F, Guglielmetti LC. SARS-CoV-2 receptor  
448 ACE2 gene expression in small intestine correlates with age. *Amino Acids* 2020.  
doi:10.1007/s00726-020-02870-z.
- 450 [54] Lian J, Jin X, Hao S, Jia H, Cai H, Zhang X, et al. Epidemiological, clinical, and  
virological characteristics of 465 hospitalized cases of coronavirus disease 2019  
452 (COVID-19) from Zhejiang province in China. *Influenza Other Respi Viruses* 2020.  
doi:10.1111/irv.12758.
- 454 [55] Jin X, Lian J-S, Hu J-H, Gao J, Zheng L, Zhang Y-M, et al. Epidemiological, clinical  
and virological characteristics of 74 cases of coronavirus-infected disease 2019  
456 (COVID-19) with gastrointestinal symptoms. *Gut* 2020;69:1002–1009.  
doi:10.1136/gutjnl-2020-320926.
- 458 [56] Khan M, Khan H, Khan S, Nawaz M. Epidemiological and clinical characteristics of  
coronavirus disease (COVID-19) cases at a screening clinic during the early  
460 outbreak period: a single-centre study. *J Med Microbiol* 2020.  
doi:10.1099/jmm.0.001231.

- 462 [57] Franz M, Rodriguez H, Lopes C, Zuberi K, Montojo J, Bader GD, et al. GeneMANIA  
update 2018. *Nucleic Acids Res* 2018;46:W60–W64. doi:10.1093/nar/gky311.
- 464 [58] Szklarczyk D, Morris JH, Cook H, Kuhn M, Wyder S, Simonovic M, et al. The STRING  
database in 2017: quality-controlled protein-protein association networks, made  
466 broadly accessible. *Nucleic Acids Res* 2017;45:D362–D368.  
doi:10.1093/nar/gkw937.
- 468 [59] Prieto C, De Las Rivas J. APID: agile protein interaction data analyzer. *Nucleic Acids  
Res* 2006;34:W298–302. doi:10.1093/nar/gkl128.
- 470 [60] Deelen P, van Dam S, Herkert JC, Karjalainen JM, Brugge H, Abbott KM, et al.  
Improving the diagnostic yield of exome-sequencing by predicting gene-phenotype  
472 associations using large-scale gene expression analysis. *Nat Commun*  
2019;10:2837. doi:10.1038/s41467-019-10649-4.
- 474 [61] Oughtred R, Stark C, Breitkreutz B-J, Rust J, Boucher L, Chang C, et al. The  
BioGRID interaction database: 2019 update. *Nucleic Acids Res* 2019;47:D529–D541.  
476 doi:10.1093/nar/gky1079.
- [62] Lee I, Blom UM, Wang PI, Shim JE, Marcotte EM. Prioritizing candidate disease  
478 genes by network-based boosting of genome-wide association data. *Genome Res*  
2011;21:1109–1121. doi:10.1101/gr.118992.110.
- 480 [63] Durinck S, Spellman PT, Birney E, Huber W. Mapping identifiers for the integration  
of genomic datasets with the R/Bioconductor package biomaRt. *Nat Protoc*  
482 2009;4:1184–1191. doi:10.1038/nprot.2009.97.
- [64] Watanabe K, Taskesen E, van Bochoven A, Posthuma D. Functional mapping and  
484 annotation of genetic associations with FUMA. *Nat Commun* 2017;8:1826.  
doi:10.1038/s41467-017-01261-5.
- 486 [65] Aguet F, Barbeira AN, Bonazzola R, Brown A, Castel SE, Jo B, et al. The GTEx  
Consortium atlas of genetic regulatory effects across human tissues. *BioRxiv* 2019.  
488 doi:10.1101/787903.

- 490 [66] Haeussler M, Zweig AS, Tyner C, Speir ML, Rosenbloom KR, Raney BJ, et al. The  
UCSC Genome Browser database: 2019 update. *Nucleic Acids Res* 2019;47:D853–  
D858. doi:10.1093/nar/gky1095.
- 492 [67] Karolchik D, Hinrichs AS, Furey TS, Roskin KM, Sugnet CW, Haussler D, et al. The  
UCSC Table Browser data retrieval tool. *Nucleic Acids Res* 2004;32:D493–6.  
494 doi:10.1093/nar/gkh103.
- [68] Dayem Ullah AZ, Oscanoa J, Wang J, Nagano A, Lemoine NR, Chelala C.  
496 SNPnexus: assessing the functional relevance of genetic variation to facilitate the  
promise of precision medicine. *Nucleic Acids Res* 2018;46:W109–W113.  
498 doi:10.1093/nar/gky399.
- [69] Li J, Han X, Wan Y, Zhang S, Zhao Y, Fan R, et al. TAM 2.0: tool for MicroRNA set  
500 analysis. *Nucleic Acids Res* 2018;46:W180–W185. doi:10.1093/nar/gky509.
- [70] Durvasula A, Sankararaman S. A statistical model for reference-free inference of  
502 archaic local ancestry. *PLoS Genet* 2019;15:e1008175.  
doi:10.1371/journal.pgen.1008175.
- 504 [71] Sankararaman S, Mallick S, Dannemann M, Prüfer K, Kelso J, Pääbo S, et al. The  
genomic landscape of Neanderthal ancestry in present-day humans. *Nature*  
506 2014;507:354–357. doi:10.1038/nature12961.
- [72] Pers TH, Timshel P, Hirschhorn JN. SNPsnap: a Web-based tool for identification  
508 and annotation of matched SNPs. *Bioinformatics* 2015;31:418–420.  
doi:10.1093/bioinformatics/btu655.
- 510 [73] Zheng Z, Huang D, Wang J, Zhao K, Zhou Y, Guo Z, et al. QTLbase: an integrative  
resource for quantitative trait loci across multiple human molecular phenotypes.  
512 *Nucleic Acids Res* 2020;48:D983–D991. doi:10.1093/nar/gkz888.

514



## Figures and Supplementary file Legends

---

### Figures

Figure 1: The ACE2-gene network. The genes that connect with ACE2 were extracted from six different gene-network databases and compiled together in one network.

Figure 2: Tissues enriched based on ACE2-network gene expression for GTEx tissues. The genes from the ACE2-network show over-representation of tissues (x-axis) and  $-\log_{10}$  p-value (y-axis). The red bars are significant enrichments.

Figure 3: Drug-set enrichment analysis. LEFT: The similarity of drugs based on pathways identified. RIGHT: Biological Processes identified based on drugs that interact with genes from the ACE2-network

Figure 4: Domain distribution of PheWAS of ACE2-network genes. The ACE2 gene network associations are grouped based on domains (y-axis) and gene names (x-axis). The size of the data points reflects number of phenotypes surviving multiple testing correction.

Figure 5: Enrichment of biological functions based on miRNA:SNP annotation. Using miRNAs annotation, over-represented biological processes are shown on y-axis and  $-\log_{10}$  pvalue on x-axis.

### Supplementary files

Supplementary file1: File containing figures S1-S60

Supplementary file2: Tables S1:S14. Tabular details of the list of genes, tissue enrichment, gene-drug interaction, drug-set enrichment, PheWAS of all genes, Significant traits of PheWAS, domain enrichment, miRNA enrichment, SNPs from the network for six COVID-19 phenotypes from COVID-19 Host Genetics Initiative – Freeze3

Supplementary file3: Text file of all the SNPs within  $\pm 10$ kb of the genes and their genomic coordinates and allele frequency.

- Column Headers:
  - Variation ID: <dbsnp rs#>
  - dbSNP: link to dbSNP, if known
  - Chromosome: Variant mapped chromosome location
  - Position: Variant start position on chromosome
  - REF Allele: Reference allele
  - ALT Allele (IUPAC): Observed allele
  - Minor Allele: Minor allele observed in global population, if known

- Minor Allele Frequency: Minor allele frequency observed in global population, if known
- Contig: Variant mapped contig location
- contigPosition: Variant start position on contig
- Band: SNP cytogenetic location

Supplementary file4: Text file of SNPs with their overlapping and nearest gene annotation using Ensembl GRCh37.

- Column Headers:
  - Variation ID: <dbsnp rs#>
  - Chromosome: Variant mapped chromosome location
  - Position: Variant start position on chromosome
  - Overlapped Gene: Name of the gene (HGNC system) to which the variant is overlapped
  - Type: Gene type, e.g., protein coding, miRNA, non coding, Pseudogene, snoRNA, lincRNA etc.
  - Annotation: Summary of whether the variant overlapped with the coding, intronic or untranslated regions of the various transcript isoforms of the gene, as annotated from Ensembl gene system.
  - Nearest Upstream Gene: If variant is not overlapped with any gene, then the gene whose end position is nearest to the variant on the left (considering the alignment of genes on the positive strand as left-to-right)
  - Type of Nearest Upstream Gene: Gene type, e.g., protein coding, miRNA, non coding, Pseudogene, snoRNA, lincRNA etc.
  - Distance to Nearest Upstream Gene: distance from the end position of the nearest upstream gene.
  - Nearest Downstream Gene: If variant is not overlapped with any gene, then the gene whose start position is nearest to the variant on the right (considering the alignment of genes on the positive strand as left-to-right)
  - Type of Nearest Downstream Gene: Gene type, e.g., protein coding, miRNA, non coding, Pseudogene, snoRNA, lincRNA etc.
  - Distance to Nearest Downstream Gene: distance from the start position of the nearest downstream gene.

Supplementary file5: Text file of all the SNPs with CADD (Combined Annotation Dependent Depletion) scores >10

- Column Headers:



- Variation ID: <dbsnp rs#>
- Chromosome: Chromosome name
- Position: Variant start position on chromosome
- Variant: <reference allele,"/",observed allele> as reported in the tool's genome-wide score
- PHRED: PHRED-like ( $-10 \cdot \log_{10}(\text{rank}/\text{total})$ ) scaled CADD-score ranking a variant relative to all possible substitutions of the human genome. A score  $\geq 10$  indicates that it is predicted to be in the 10% most deleterious substitutions that you can do to the human genome, a score  $\geq 20$  indicates the 1% most deleterious and so on.

Supplementary file6: Text file of all the SNPs with DeepSEA (deep learning based algorithm framework) functional scores > 0.5, which represents atleast 50% probability to have regulatory effect

- Column Headers:
  - Variation ID: <dbsnp rs#>
  - Chromosome: Chromosome name
  - Position: Variant start position in the chromosome
  - Variant: <reference allele,"/",observed allele> as reported in the tool's genome-wide score
  - eQTL Probability: The probability of the variant being a eQTL variant given by functional variant prioritization classifier.
  - GWAS Probability: The probability of the variant being a trait-associated (GWAS) variant given by functional variant prioritization classifier.
  - HGMD Probability: The probability of the variant being a inherited disease-associated (HGMD) variant given by functional variant prioritization classifier.
  - Functional Significance Score: A measure in the range [0-1] depicting the significance of magnitude of predicted chromatin effect and evolutionary conservation. Lower score indicates higher likelihood of functional significance of the variant.

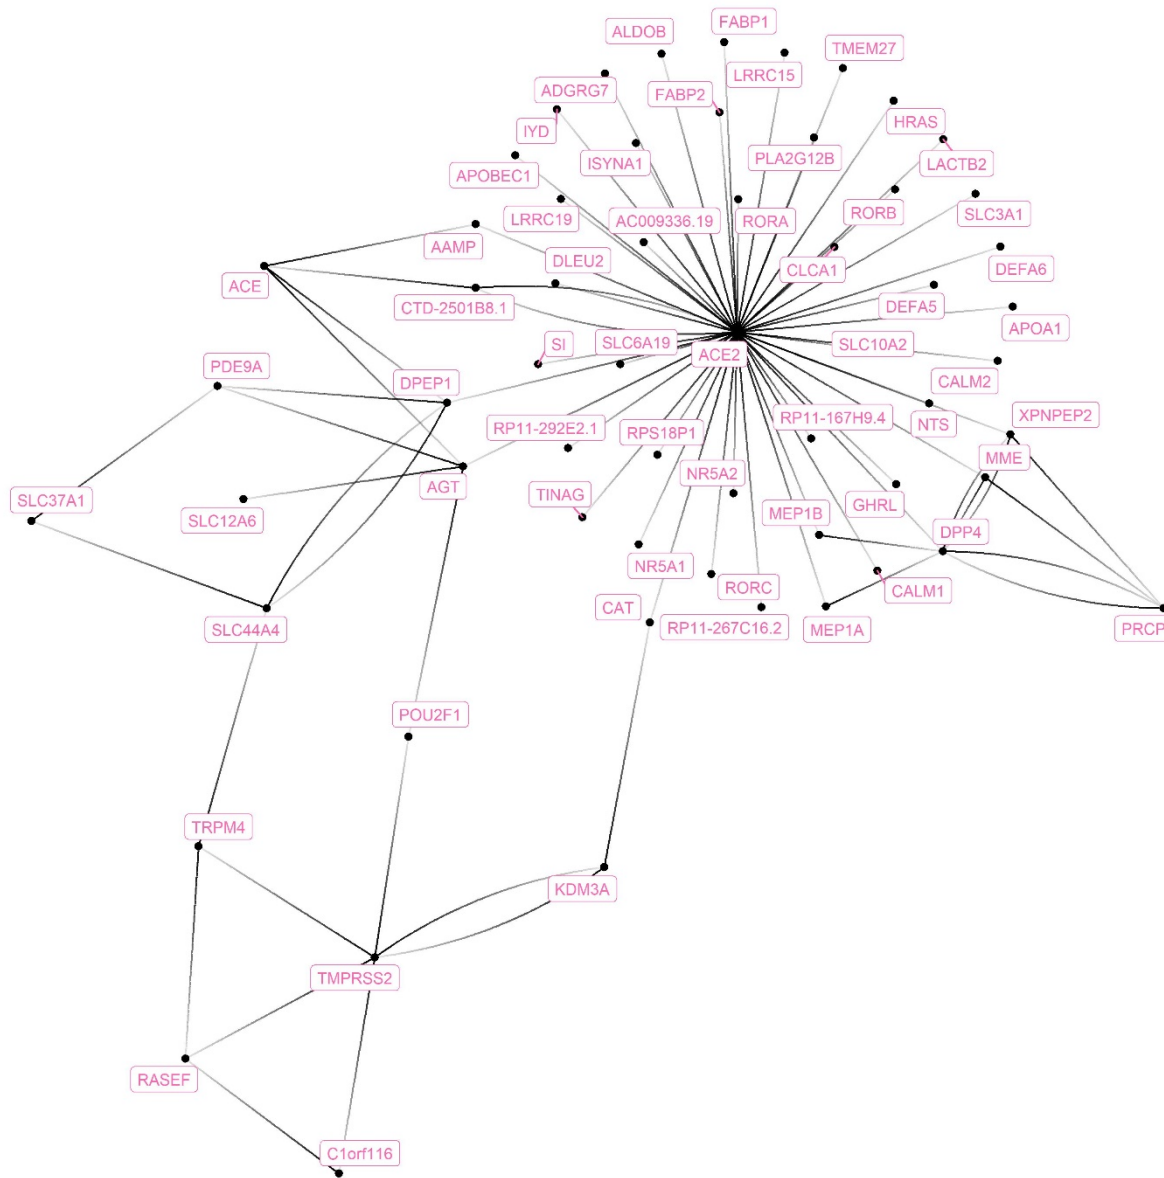

**Figure 1: The ACE2-gene network.** The genes that connect with ACE2 were extracted from six different gene-network databases and compiled together in one network.

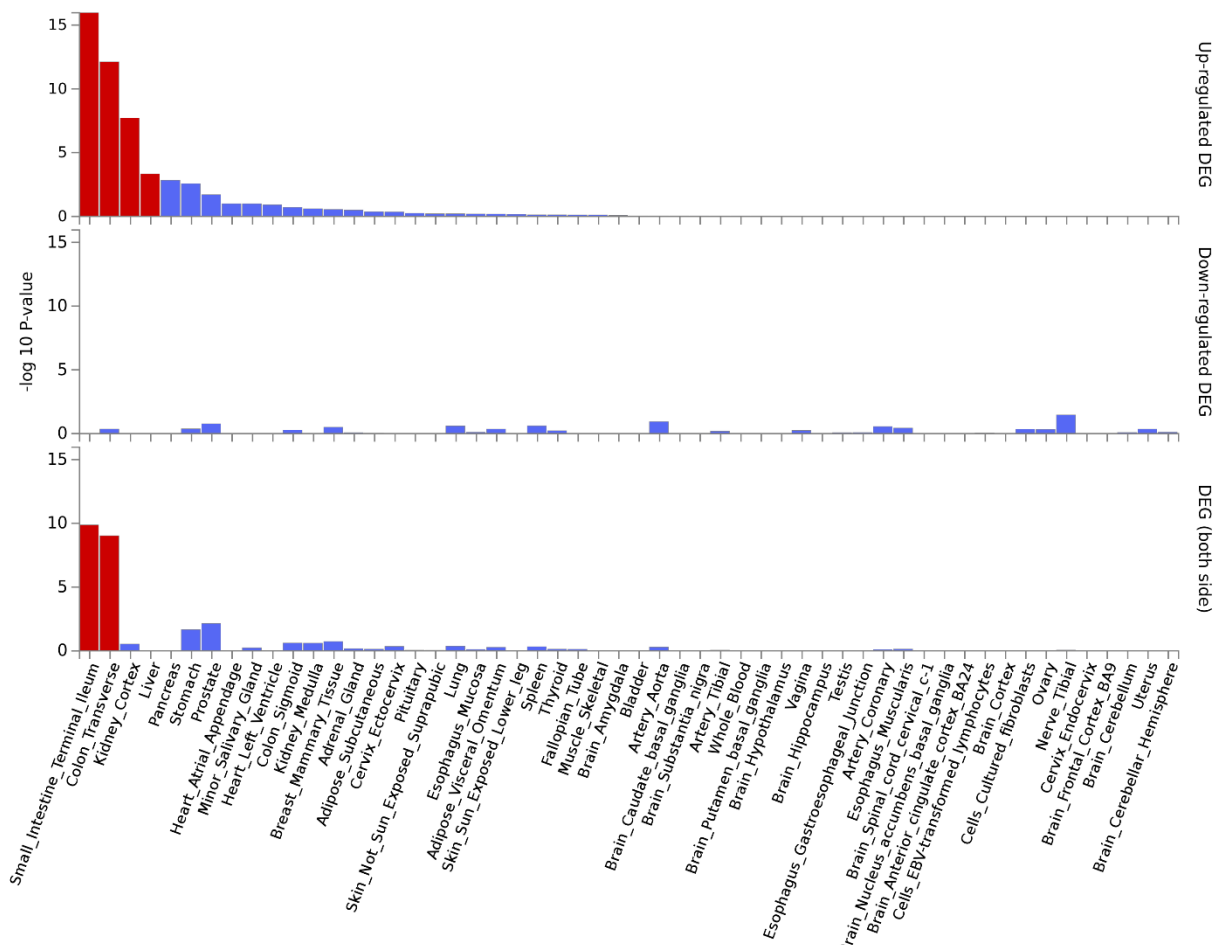

**Figure 2: Tissues enriched based on ACE2-network gene expression for GTEx tissues. The genes from the ACE2-network show over-representation of tissues (x-axis) and -log<sub>10</sub> p-value (y-axis). The red bars are significant enrichments.**

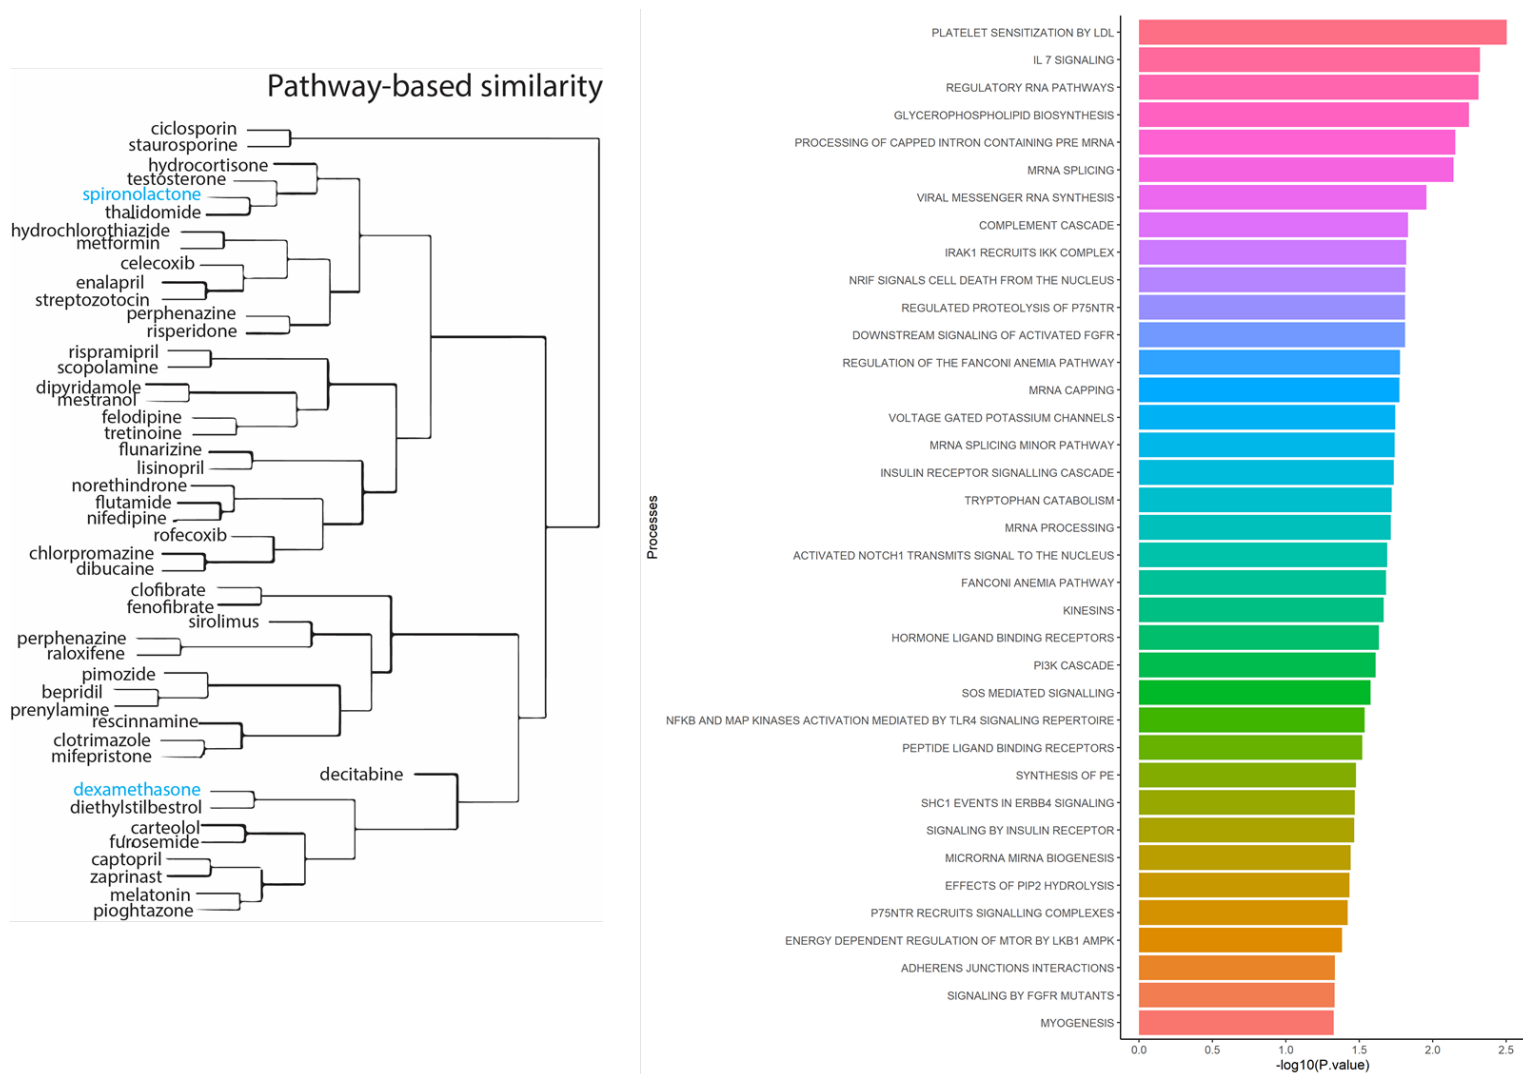

**Figure 3: Drug-set enrichment analysis.** LEFT: The similarity of drugs based on pathways identified. RIGHT: Biological Processes identified based on drugs that interact with genes from the ACE2-network.

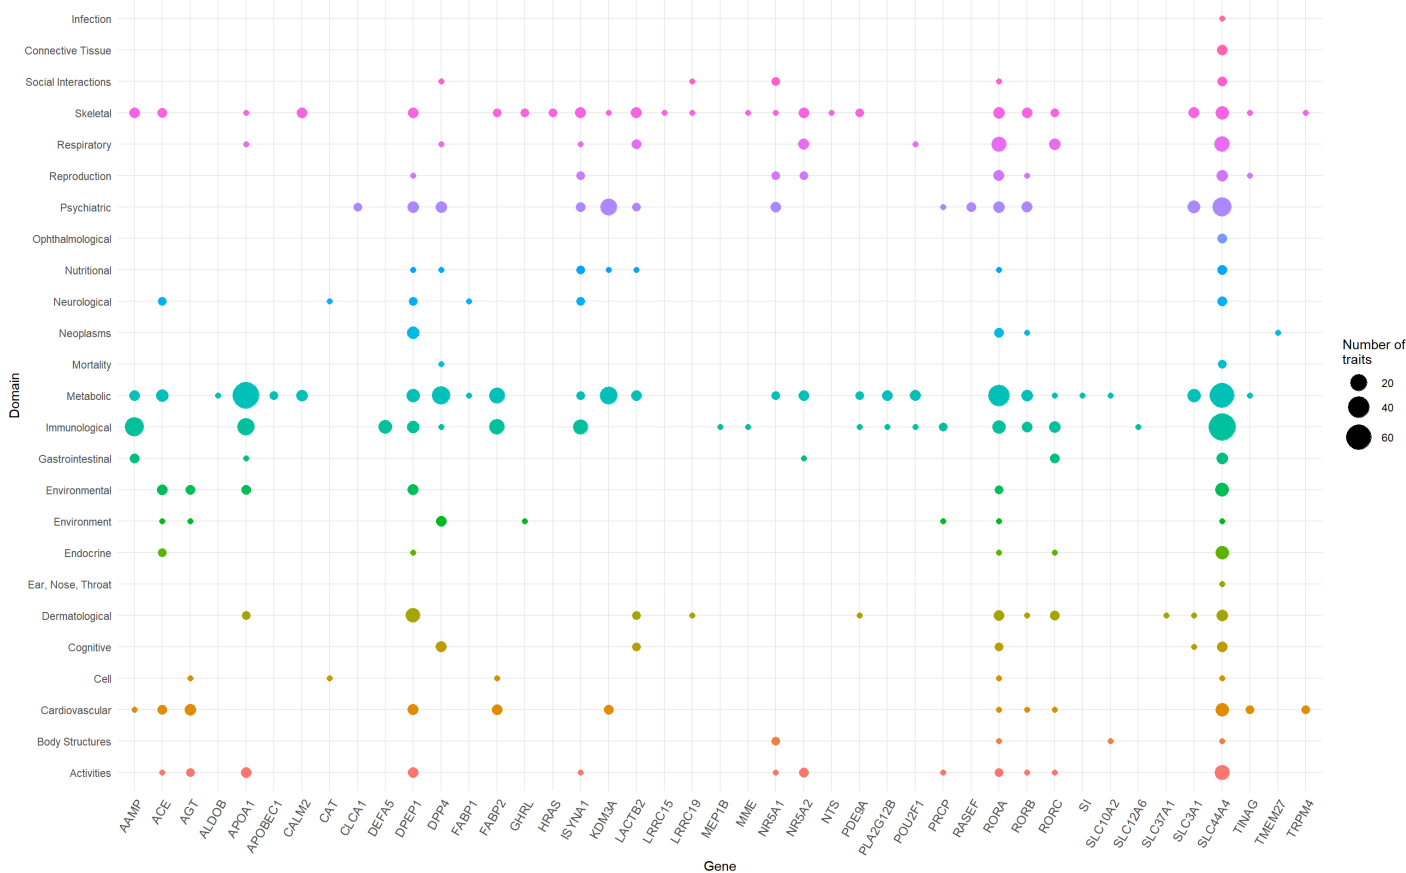

**Figure 4: Domain distribution of PheWAS of ACE2-network genes.** The ACE2 gene network associations are grouped based on domains (y-axis) and gene names (x-axis). The size of the data points reflects number of phenotypes surviving multiple testing correction.

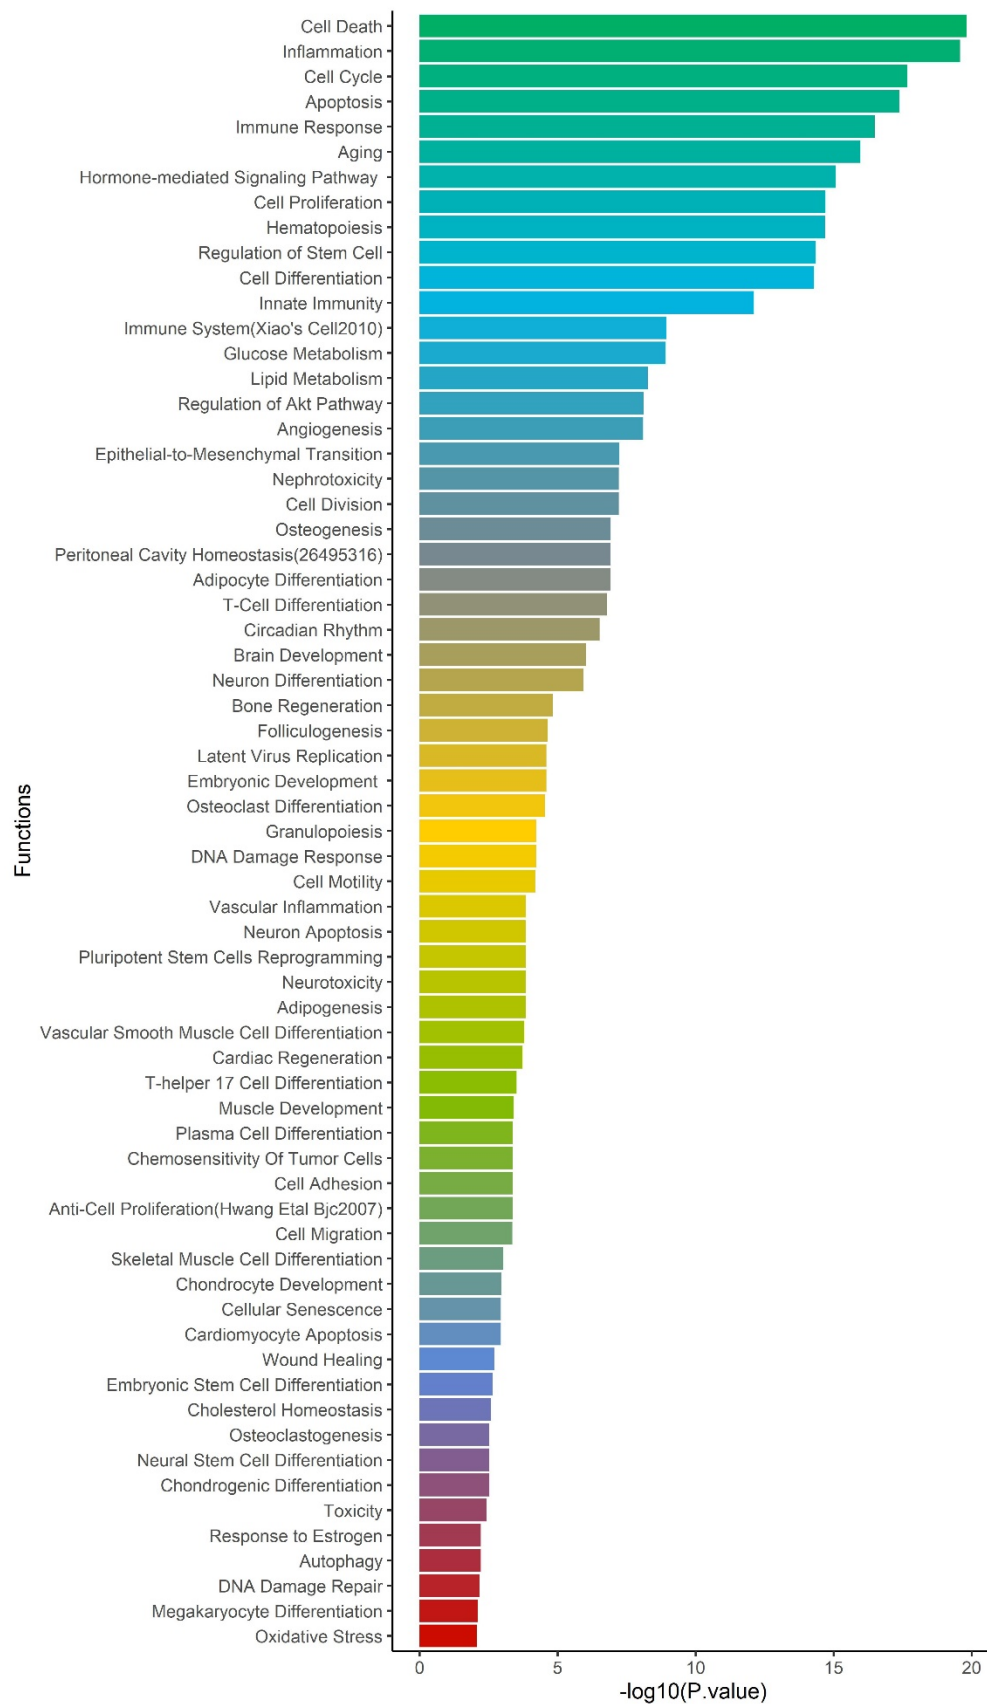

**Figure 5: Enrichment of biological functions based on miRNA:SNP annotation.** Using miRNAs annotation, over-represented biological processes are shown on y-axis and  $-\log_{10}$  pvalue on x-axis.
